# Supplementary material for: Visible light-driven decomposition of gaseous benzene on robust Sn2+-doped anatase TiO2 nanoparticles
Source: Royal Society of Chemistry journal article supplement (doi:10.1039/c4ra05904b), 2014-01-01
Supplement: c4ra05904b1.pdf [file c4ra05904b1.pdf]

**Visible light-driven decomposition of gaseous benzene on  
robust Sn<sup>2+</sup>-doped anatase TiO<sub>2</sub> nanoparticles**

Huaqiang Zhuang, Quan Gu, Jinlin Long\*, Huan Lin, Huaxiang Lin, Xuxu Wang\*

Research Institute of Photocatalysis, State Key Laboratory of Photocatalysis on  
Energy and Environment, College of Chemistry, Fuzhou University, Fuzhou 350116,

People's Republic of China

E-mail: [jllong@fzu.edu.cn](mailto:jllong@fzu.edu.cn); [xwang@fzu.edu.cn](mailto:xwang@fzu.edu.cn)

Web: [chem.fzu.edu.cn/szdw/teacherinfo.aspx?id=40](http://chem.fzu.edu.cn/szdw/teacherinfo.aspx?id=40)

Tel: +86-591-83779121; Fax: +86-591-83779121

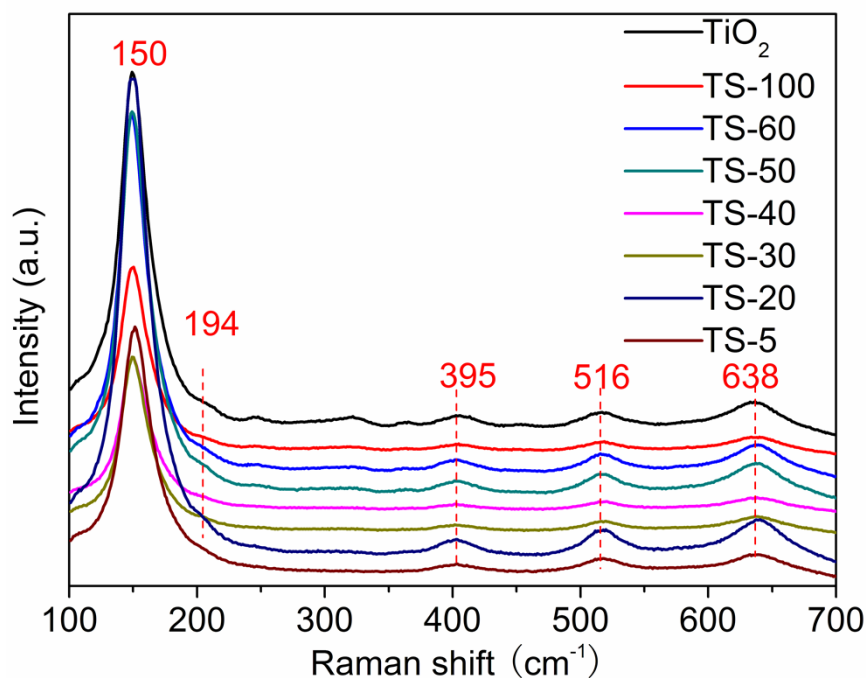

**Figure S1** The Raman spectrum of the obtained TS-x samples and pure  $\text{TiO}_2$ .

To verify the structure of Sn-incorporated  $\text{TiO}_2$ , the TS-x samples were further characterized by the Raman technology, as shown in Figure S1. There are one strong Raman peak at  $149.7\text{cm}^{-1}$  and four weak peaks at 194, 395, 516 and  $638\text{ cm}^{-1}$  are assigned to Eg, Eg, B1g, A1g, and Eg, respectively, which are consistent with anatase structure  $\text{TiO}_2$ . [1, 2] From the Raman spectra of the TS-x samples, the main Raman peaks at  $113\text{cm}^{-1}$  and  $211\text{cm}^{-1}$  attributed to SnO crystalline form can't be detected, which indicates there don't exist a separate SnO crystalline phase in the Sn-doped  $\text{TiO}_2$  system. [3] The result is in good agreement with the result from the XRD pattern of the TS-x samples.

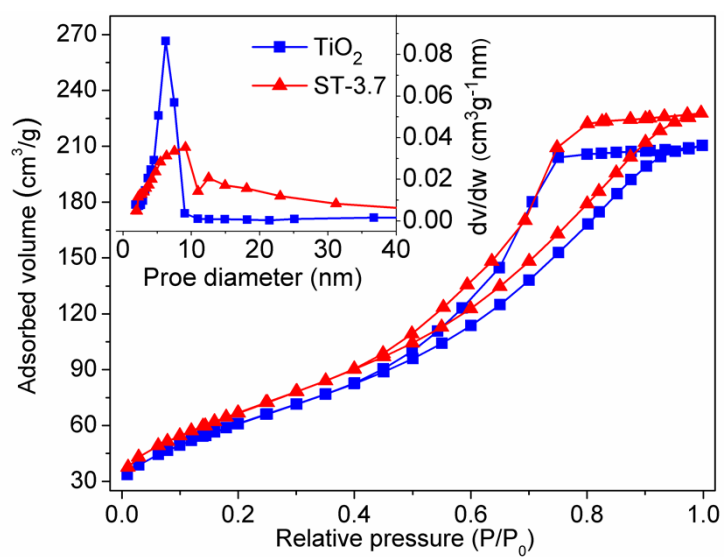

**Figure S2** Nitrogen adsorption-desorption isotherms of the pure  $\text{TiO}_2$  and TS-40 samples. The Insert shows the corresponding Barret-Joyner-Halenda (BJH) pore size distributions.

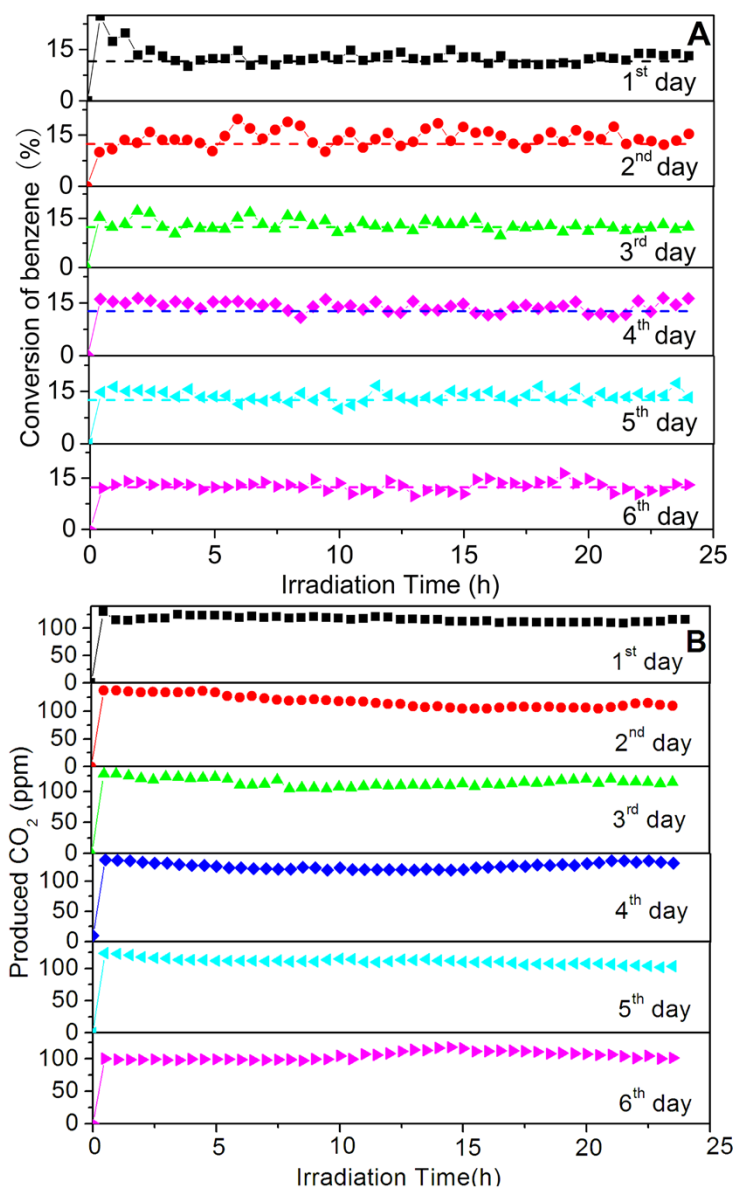

**Figure S3** Cycle runs for the photooxidation of benzene on TS-20 sample: (A) the conversion of benzene; (B) The yield of produced CO<sub>2</sub>.

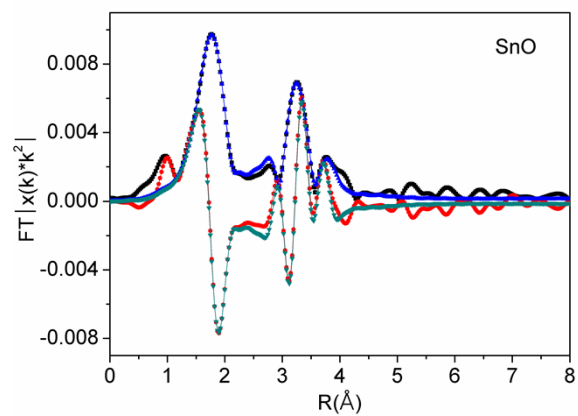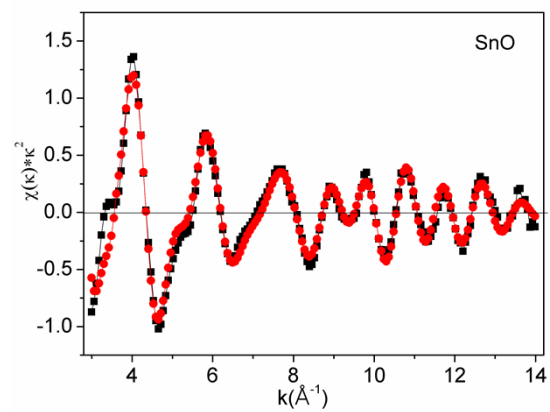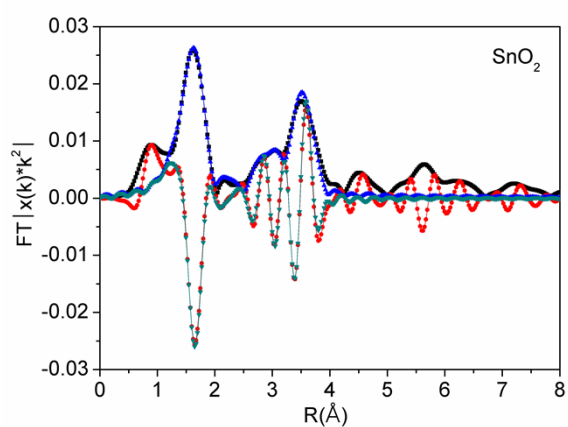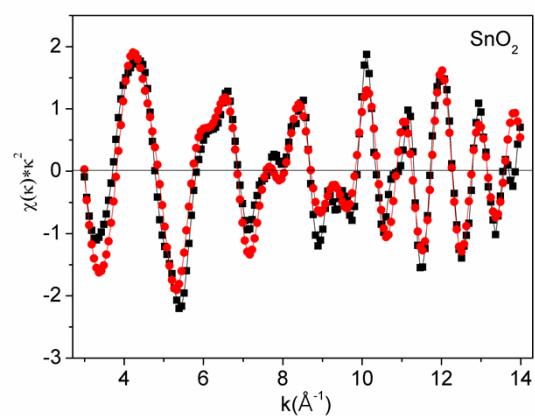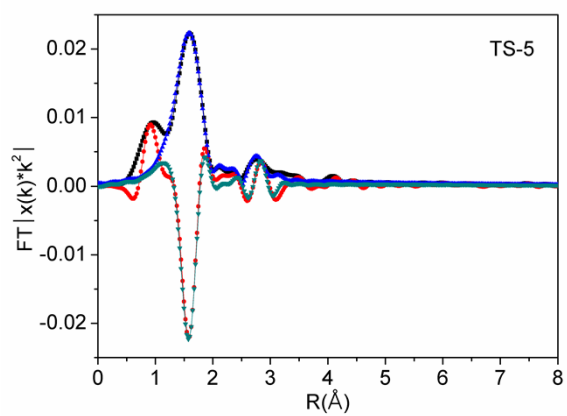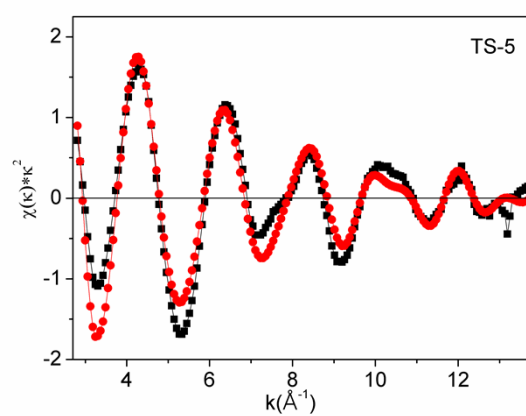

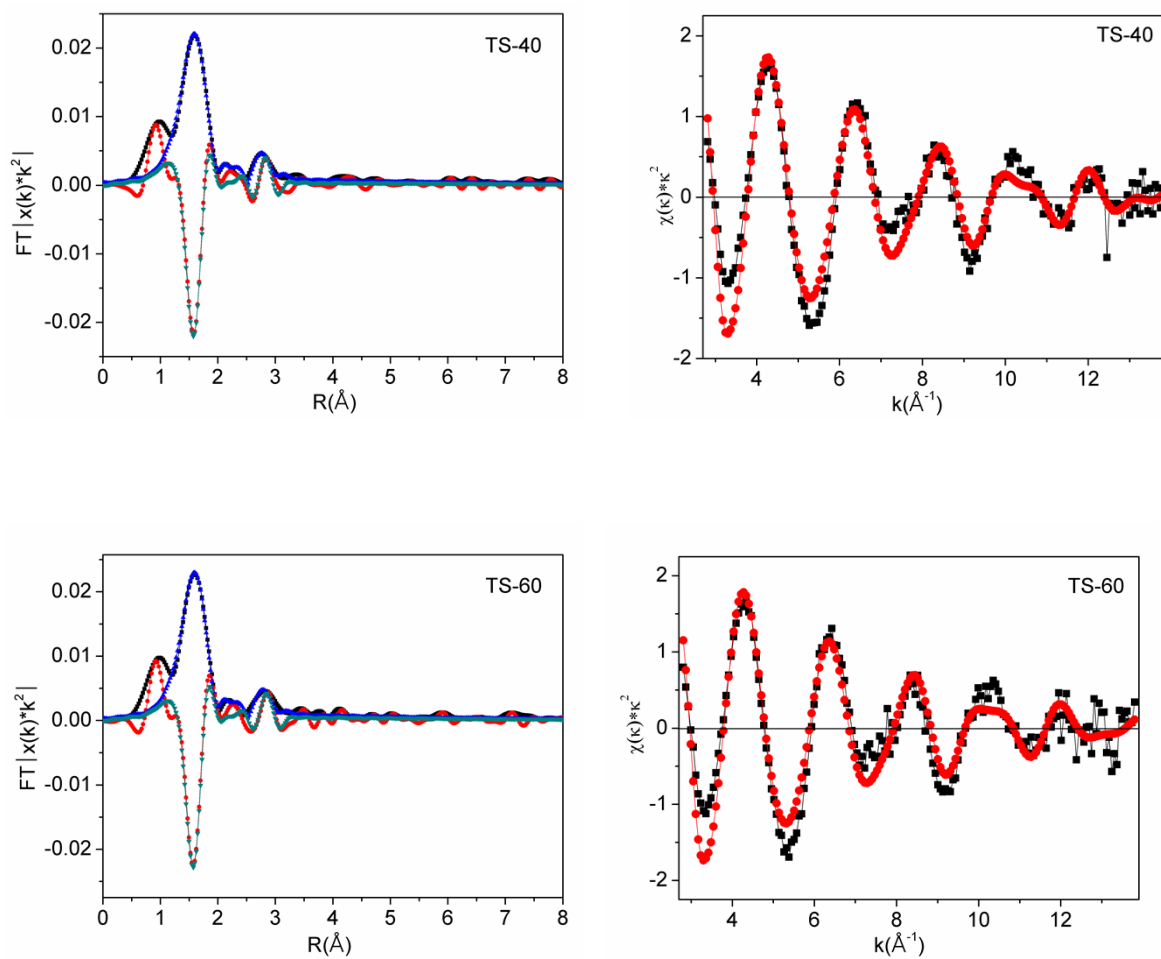

**Figure S4** Sn K-edge EXAFS fit results for the SnO, SnO<sub>2</sub>, TS-5, TS-40 and TS-60 samples.

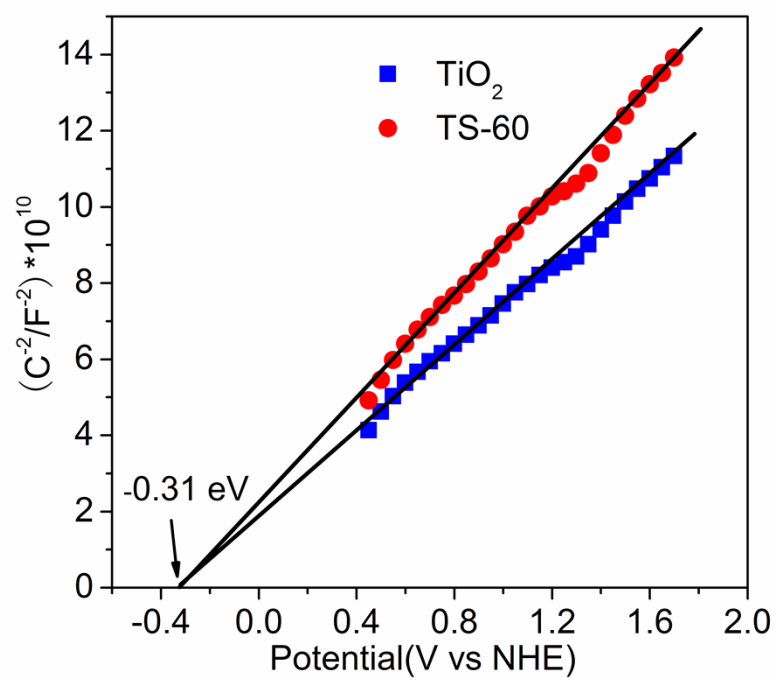

**Figure S5** Mott-Schottky plots of the pure  $\text{TiO}_2$  and TS-60 material.

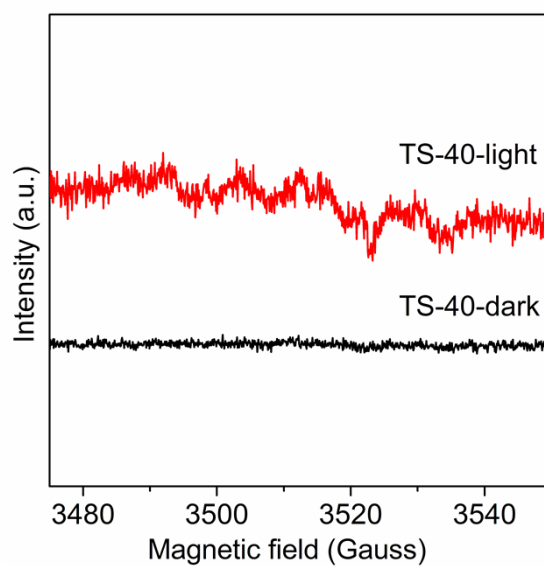

**Figure S6** ESR signal of the DMPO- $\cdot\text{O}_2$  spin adducts for TS-40 sample without irradiation and with visible light irradiation.

- [1] W. Su, J. Zhang, Z. Feng, T. Chen, P. Ying, C. Li, J. Phys. Chem. C 112 (2008) 7710-7716.
- [2] H.-F. Wang, L.-Y. Chen, W.-N. Su, J.-C. Chung, B.-J. Hwang, J. Phys. Chem. C 114 (2010) 3185-3189.
- [3] Y. Zhao, J. Liu, L. Shi, S. Yuan, J. Fang, Z. Wang, M. Zhang, Appl. Catal. B: Environ. 103 (2011) 436-443.
